# Supplementary material
Source: PubMed Central journal article supplement (PMC5154619)
Supplement: NIHMS831834-supplement-Suplemental.pdf [file NIHMS831834-supplement-Suplemental.pdf]

## Supplementary Materials for

### **Gain-of-function mutations in protein kinase C $\alpha$ (PKC $\alpha$ ) may promote synaptic defects in Alzheimer's disease**

Stephanie I. Alfonso, Julia A. Callender, Basavaraj Hooli, Corina E. Antal,  
Kristina Mullin, Mathew A. Sherman, Sylvain E. Lesné, Michael Leitges,  
Alexandra C. Newton,\* Rudolph E. Tanzi,\* Roberto Malinow\*

\*Corresponding author. Email: anewton@ucsd.edu (A.C.N.); tanzi@helix.mgh.harvard.edu (R.E.T.);  
rmalinow@ucsd.edu (R.M.)

Published 10 May 2016, *Sci. Signal.* **9**, ra47 (2016)  
DOI: 10.1126/scisignal.aaf6209

#### **The PDF file includes:**

Fig. S1. A $\beta$  abundance in brain slices infected with virus producing CT100 is similar in wild-type and *PRKCA*<sup>-/-</sup> slices.

Fig. S2. Pedigree charts of the NIMH families found to carry rare PKC $\alpha$  variants.

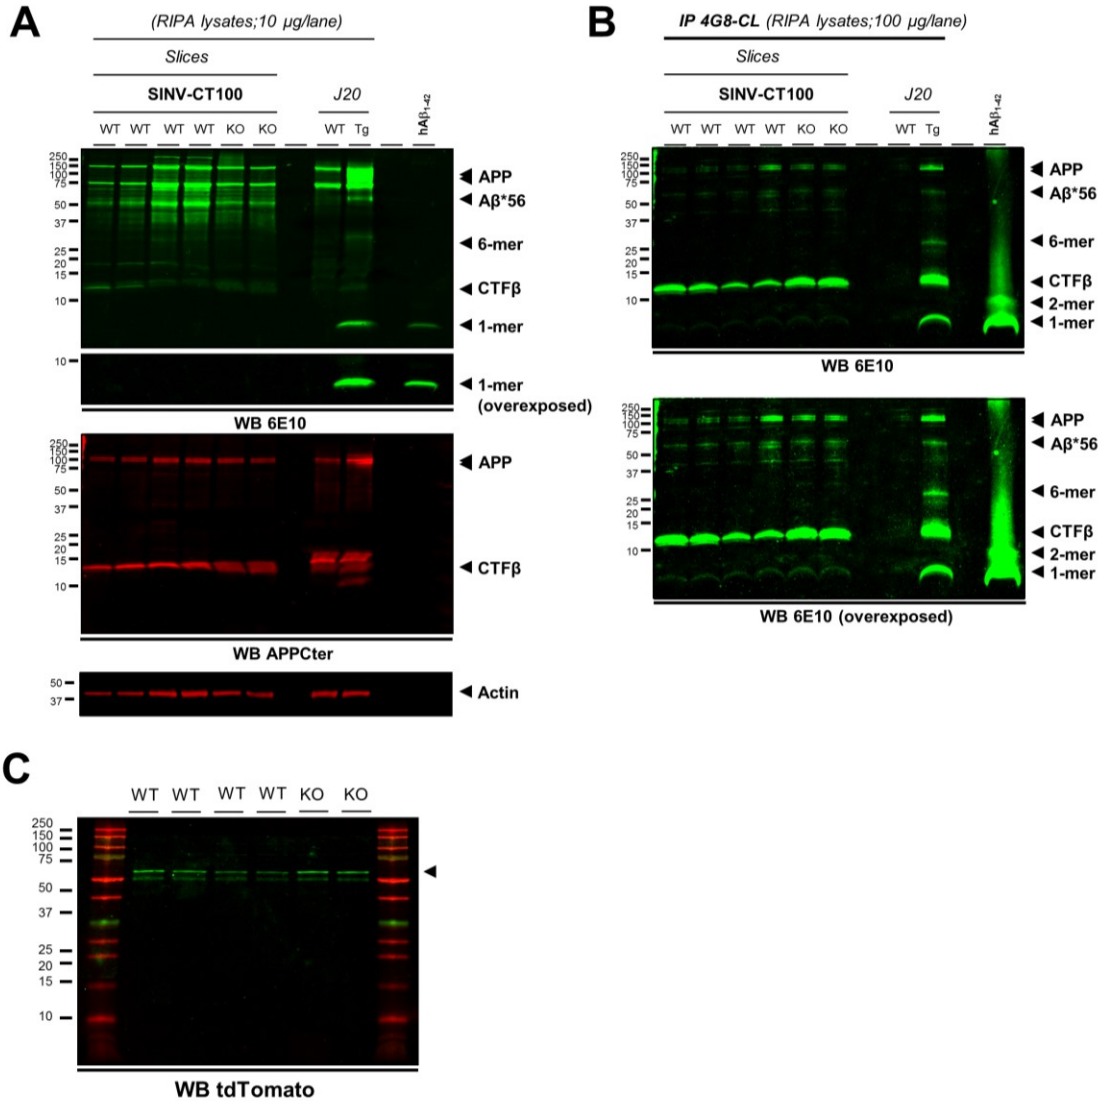

**Figure S1. A $\beta$  abundance in brain slices infected with virus producing CT100 is similar in wild-type and *PRKCA*<sup>-/-</sup> slices. (A)** Representative western blot images of A $\beta$  levels detected in brain slices infected with CT100 using 6E10 (green, top) and APPCter (red, middle) antibodies. Actin was used as internal loading control (red, bottom). RIPA lysates of forebrains from 17-month-old WT and J20 mice served as negative and positive controls as well as recombinant human A $\beta$ <sub>1-42</sub> peptides (3 ng). **(B)** Due to the low abundance of A $\beta$  by direct SDS-PAGE analysis, A $\beta$  levels were further determined by immunoprecipitation (IP) using cross-linked 4G8 beads (5  $\mu$ g/IP). The lower insert corresponds to an overexposed image scan. **(C)** Western blot image illustrating the expression of tdTomato following infection of WT and KO slices. Note: CT100 = CTF $\beta$ .

### NH01

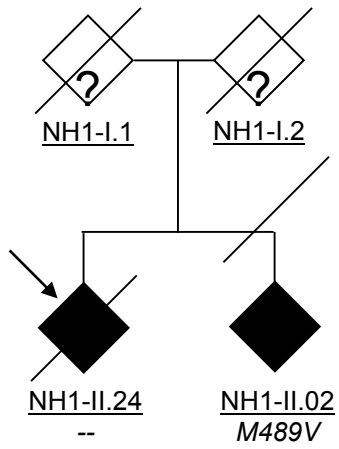

### NH02

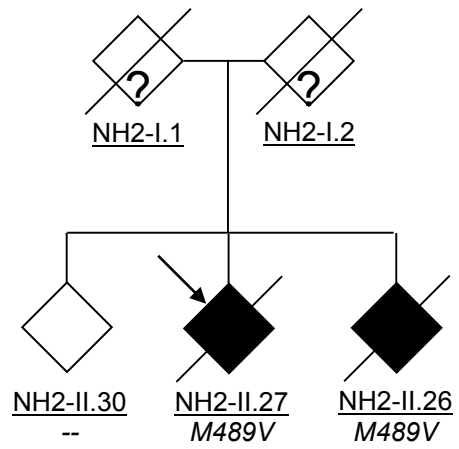

### NH03

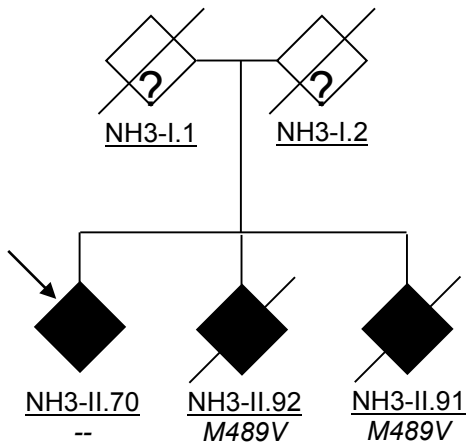

### NH04

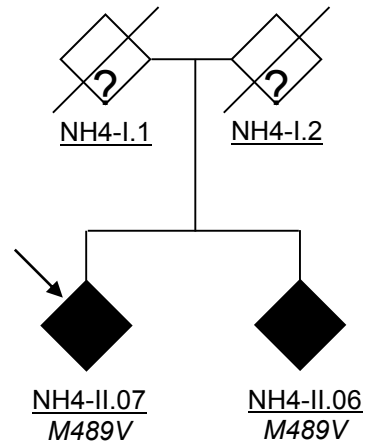

## NH05

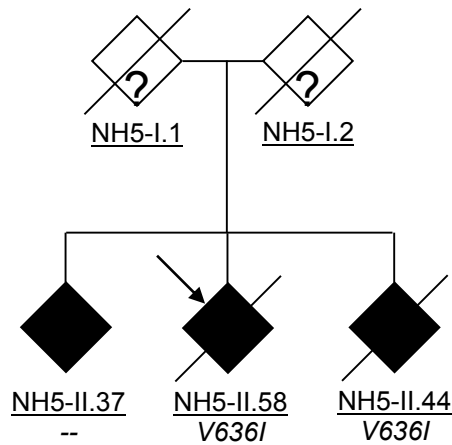

## NH06

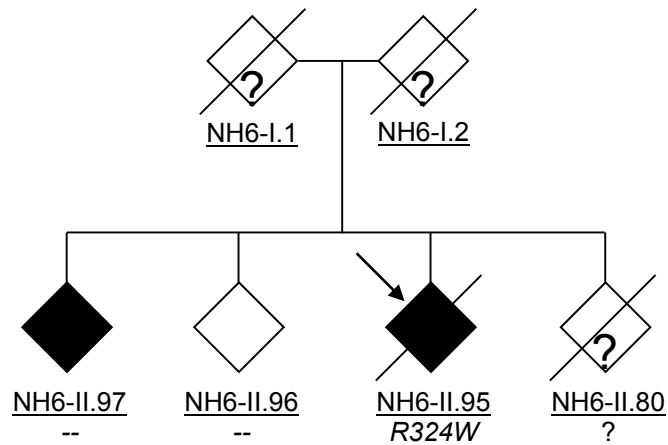

**Figure S2: Pedigree charts of the NIMH families found to carry rare PKC $\alpha$  variants.** Information for each individual is (from top to bottom): Individual ID, genotype of rare variant in PKC $\alpha$  if present, "--" for wild-type. Probands are indicated by arrows. No DNA or clinical information was available from the founders ("?) and in NH6-II.80.
